# Supplementary material for: Hippocampal projections to the anterior olfactory nucleus differentially convey spatiotemporal information during episodic odour memory
Source: PubMed Central journal article supplement (PMC6048034; doi:10.1038/s41467-018-05131-6), 2018-07-16
Supplement: 41467_2018_5131_MOESM3_ESM.pdf [file 41467_2018_5131_MOESM3_ESM.pdf]

### **Description of Additional Supplementary Files:**

Supplementary Movie 1. Representative footage of the first minute of the context-driven odour recollection test. Left demonstrates behaviour on day 9 of the odour-context association training. Right depicts the same mouse's behaviour upon reintroduction to the context on day 10 with no odour applied to the cotton swab. A clear increase in investigation of the cotton swab is observed.
